# Supplementary material for: CSN1S1 and LALBA Polymorphisms and Other Factors Influencing Yield, Composition, Somatic Cell Score, and Technological Properties of Cow’s Milk
Source: MDPI journal article supplement (doi:10.3390/ani13132079), 2023-06-23
Supplement: s1 [file s1]

**Table S1.** Descriptive statistics of the milk performance of Holstein and Czech Simmental cows

| Trait              | 1 <sup>st</sup> lactation |       |       |       |        | 2 <sup>nd</sup> lactation |       |       |       |        |
|--------------------|---------------------------|-------|-------|-------|--------|---------------------------|-------|-------|-------|--------|
|                    | n                         | Mean  | SD    | Min.  | Max.   | n                         | Mean  | SD    | Min.  | Max.   |
| Milk yield (kg)    | 170                       | 8,222 | 1,881 | 4,294 | 13,285 | 156                       | 9,125 | 2,178 | 5,245 | 1,5453 |
| Milk fat (%)       | 170                       | 4.16  | 0.32  | 3.41  | 5.28   | 156                       | 4.17  | 0.37  | 3.36  | 5.31   |
| Milk fat (kg)      | 170                       | 340.9 | 76.4  | 182.0 | 573.0  | 156                       | 379.0 | 90.8  | 206.0 | 617.0  |
| Crude protein (%)  | 170                       | 3.46  | 0.22  | 2.85  | 3.94   | 156                       | 3.50  | 0.22  | 2.95  | 4.01   |
| Crude protein (kg) | 170                       | 281.5 | 53.5  | 166.0 | 430.0  | 156                       | 316.2 | 65.2  | 201.0 | 489.0  |

n number of lactations of cows; SD standard deviation.

**Table S2.** Descriptive statistics of the milk quality of Holstein and Czech Simmental cows

|                                     | 1 <sup>st</sup> and 2 <sup>nd</sup> lactations |        |         |       |       |
|-------------------------------------|------------------------------------------------|--------|---------|-------|-------|
|                                     | n                                              | Mean   | SD      | Min.  | Max.  |
| Milk fermentation ability (ml NaOH) | 335                                            | 14.85  | 4.07    | 6.73  | 35.5  |
| Renneting subjectively (sec)        | 363                                            | 491.41 | 216.263 | 188   | 1600  |
| Renneting instrumentally (sec)      | 338                                            | 303.85 | 128.62  | 20    | 781   |
| Ethanol test (ml of ethanol)        | 343                                            | 0.994  | 1.011   | 0.20  | 5.50  |
| Somatic cell score                  | 355                                            | 2.862  | 1.567   | 0.356 | 8.761 |
| Lactose monohydrate (%)             | 355                                            | 4.93   | 0.22    | 3.65  | 5.58  |
| Citric acid (%)                     | 354                                            | 0.19   | 0.03    | 0.11  | 0.34  |
| Acetone (mmol/L)                    | 354                                            | 0.14   | 0.11    | 0.01  | 0.94  |
| Ketones BHB <sup>1</sup> (mmol/L)   | 351                                            | 0.10   | 0.17    | 0.01  | 1.46  |
| Urea (mg/100 ml)                    | 355                                            | 27.2   | 6.6     | 8.1   | 55.4  |
| Not fat solid (%)                   | 272                                            | 9.08   | 0.42    | 7.75  | 10.23 |
| Casein (%)                          | 151                                            | 2.79   | 0.34    | 2.02  | 3.83  |

n number of repeating measuring of samples; SD standard deviation; <sup>1</sup>betahydroxybutyrate.
